## Distinct Processing of Sensory Prediction Error and Task Error during Motor Learning

Jonathan S. Tsay<sup>1,2</sup>, Adrian M. Haith<sup>3</sup>, Richard B. Ivry<sup>1,2</sup>, Hyosub E. Kim<sup>4,5</sup>

<sup>1</sup>*Department of Psychology, University of California, Berkeley*

<sup>2</sup>*Helen Wills Neuroscience Institute, University of California, Berkeley*

<sup>3</sup>*Department of Neurology, Johns Hopkins University*

<sup>4</sup>*Department of Physical Therapy, University of Delaware, Newark*

<sup>5</sup>*Department of Psychological and Brain Sciences, University of Delaware*

### Corresponding author Information:

Name: Jonathan Tsay

Email: [xiaotsay2015@berkeley.edu](mailto:xiaotsay2015@berkeley.edu)

Address: 2121 Berkeley Way, Berkeley, CA 94704

**Key words:** Motor learning, Visuomotor Adaptation, Error Based Learning, Target Jump

### Abstract

While sensory-prediction error (SPE), the difference between predicted and actual sensory feedback, is recognized as the primary signal that drives implicit motor recalibration, recent studies have shown that task error (TE), the difference between sensory feedback and the movement goal, also plays a modulatory role. To systematically examine how SPE and TE collectively shape implicit recalibration, we performed a series of visuomotor learning experiments, introducing perturbations that varied the size of TE using a popular target displacement method and the size of SPE using a clamped visual feedback method. In Experiments 1 – 2, we observed robust sign-dependent changes in hand angle in response to perturbations with both SPE and TE but failed to observe changes in hand angle in response to TE-only perturbations. Yet in Experiments 3 – 4, the magnitude of TE modulated implicit recalibration in the presence of a fixed SPE. Taken together, these results underscore that implicit recalibration is driven by both SPE and TE (Kim, Parvin, & Ivry, 2019), while specifying unappreciated interactions between these two error-based processes. First, TE only impacts implicit calibration when SPE is present. Second, transient changes occurring when the target is displaced to manipulate TE has an attenuating effect on implicit recalibration, perhaps due to attention being directed away from the sensory feedback.

## Introduction

Sensorimotor adaptation is an essential feature of human competence, allowing us to flexibly move in novel and changing environments (Kim, Avraham, & Ivry, 2020; John W. Krakauer, Hadjiosif, Xu, Wong, & Haith, 2019; Ryan Morehead & de Xivry, 2021; Shadmehr, Smith, & Krakauer, 2010). Multiple learning processes have been shown to contribute to the performance changes observed in adaptation tasks, including an aiming process which is explicit, volitional, and learns rapidly and a recalibration process which is implicit, automatic, and learns slowly (Haith, Huberdeau, & Krakauer, 2015; Hegele & Heuer, 2010; McDougle, Ivry, & Taylor, 2016; Taylor & Ivry, 2011; Taylor, Krakauer, & Ivry, 2014; Werner et al., 2015). Recent work has focused on how these two learning processes may be driven by distinct error signals: Whereas explicit aiming responds to task error (TE), a signal reflecting task performance (Day, Roemmich, Taylor, & Bastian, 2016; Taylor & Ivry, 2011), implicit recalibration responds to sensory prediction error (SPE), an error reflecting the difference between predicted and actual feedback (Donchin, Francis, & Shadmehr, 2003; Kim, Morehead, Parvin, Moazzezi, & Ivry, 2018; Lee, Oh, Izawa, & Schweighofer, 2018; Mazzoni & Krakauer, 2006; Morehead, Taylor, Parvin, & Ivry, 2017; Shadmehr et al., 2010; Wolpert, Miall, & Kawato, 1998). Moreover, these two learning processes are thought to rely on distinct neural modules, with explicit aiming requiring more prefrontal control (Anguera, Reuter-Lorenz, Willingham, & Seidler, 2010; Benson, Anguera, & Seidler, 2011; Taylor & Ivry, 2014) and implicit recalibration requiring more cerebellar control (Butcher et al., 2017; Hadjiosif et al., 2014; Izawa, Criscimagna-Hemminger, & Shadmehr, 2012; Schlerf, Xu, Klemfuss, Griffiths, & Ivry, 2013; Taylor, Klemfuss, & Ivry, 2010; Tseng, Diedrichsen, Krakauer, Shadmehr, & Bastian, 2007).

However, recent results from visuomotor rotation tasks have motivated a broader perspective of implicit recalibration, and in particular, led to the proposal that implicit recalibration is sensitive not only to sensory prediction error, but also to task outcome. Empirically, the evidence supporting this hypothesis comes from studies in which perturbed visual feedback (the source of SPE) is combined with a manipulation of target size or target jumps (Cameron, Franks, Inglis, & Chua, 2010a, 2010b; Magescas & Prablanc, 2006) to create a condition in which the visual feedback “hits” the target (Figure 1). Adaptation in such situations is attenuated by about ~20% compared to that observed in control conditions with a similar SPE (Kim et al., 2019; Leow, Marinovic, de Ruyg, & Carroll, 2018). The hypothesis that implicit recalibration is sensitive to both SPE and task outcome is consistent with recent neurophysiological observations of reward-related activity in the cerebellum (Heffley & Hull, 2019; Hull, 2020; Ohmae & Medina, 2015; Sendhilnathan, Ipata, & Goldberg, 2020; Wagner, Kim, Savall, Schnitzer, & Luo, 2017).

But how exactly are SPE and task outcome combined to drive implicit recalibration? One possibility is that behavior reflects the operation of two independent learning processes, one sensitive to SPE and the other sensitive to task outcome (Kim et al., 2019). While this dual-error model is consistent with existing findings, it is unknown whether this reflects the operation of two learning processes that operate independently. For example, it remains to be seen if TE-only would be sufficient to drive adaptation, as would be predicted by such a dual-error model.

Alternatively, SPE and task outcome may interact. For example, the strength of the SPE might be modulated by task outcome; if the displaced cursor still manages to intersect the target, a reward signal linked with task success could weaken the system’s sensitivity to SPE, reducing the rate of recalibration (Gonzalez Castro, Monsen, & Smith, 2011; Kim et al 2019; Shmuelof et al., 2012). A different form of interaction might arise from processes tangential to recalibration. For example, displacement of the target, as is commonly used to manipulate TE, might capture attention and weaken the salience of the SPE. In principle, the interaction between TE and SPE could also be a combination of multiple effects.

To examine how SPE and TE collectively shape implicit recalibration, we performed a series of visuomotor experiments that systematically varied the size of the SPE and TE. To control the size of SPE (i.e., operationalized as the difference between the cursor feedback and the original target location), we used clamped visual feedback (Morehead et al., 2017), in which the timing and extent of cursor motion is linked to hand motion, but the cursor trajectory is offset by a fixed angle relative to the target, and thus independent of the hand trajectory. To control the size of TE (i.e., operationalized as the difference between the cursor feedback and the new target location), we jumped the target by a variable amount soon after movement initiation. In all cases, these manipulations were coupled with instructions to ignore the visual feedback and always reach straight towards the original target – an approach which has been shown to reliably elicit implicit recalibration without contamination from explicit strategies (Leow et al., 2018; Tsay, Parvin, & Ivry, 2020). Together, these conditions will allow us to dissociate the effects of SPE and TE on implicit recalibration.

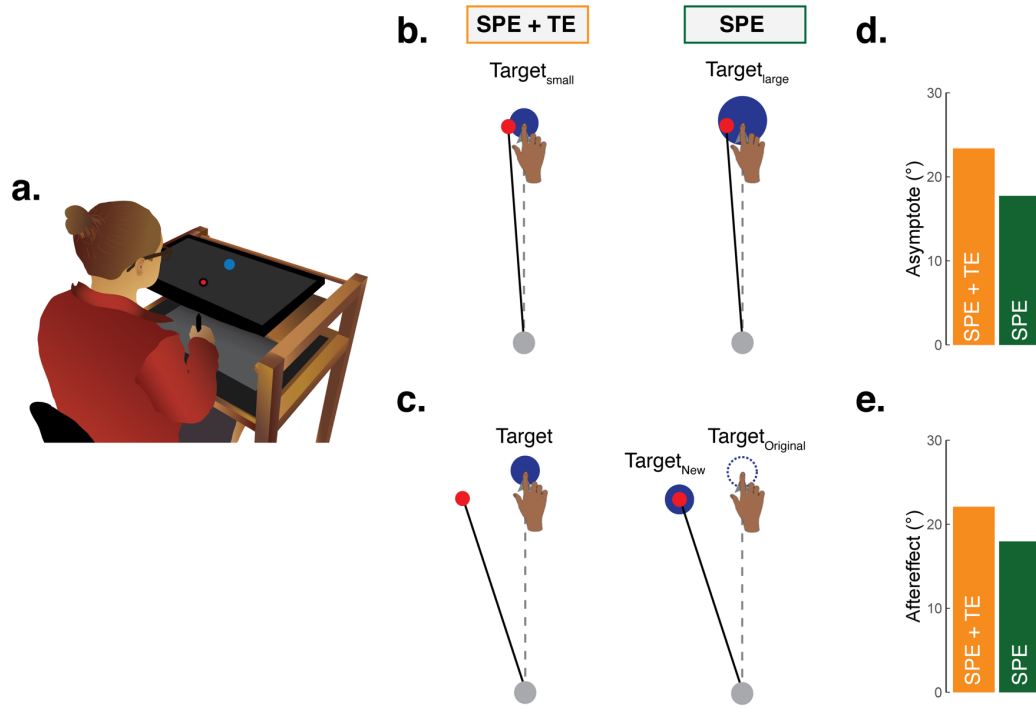

**Figure 1: Implicit recalibration elicited by SPE + TE and SPE-only.** (a) Illustration of experimental apparatus. (b-c) Task outcome was manipulated by either varying the size of the target (Kim et al, 2019) or varying the size of the target jump (Leow et al, 2018). Both SPE and TE are present when the cursor feedback straddles or misses the target, and only SPE is present when the cursor “hits” the target. (d-e) Implicit recalibration, as measured by the asymptote of hand angle in a clamped feedback design in Kim et al 2019 or during no-feedback aftereffect trials in a standard visuomotor rotation design, was reduced when TE was removed.

## Results

In Exp 1, we examined whether TE-only perturbations would elicit implicit recalibration (Figure 2). We induced TEs by jumping the target a varying amount, between  $\pm 16^\circ$  from trial to trial, while pairing all of these conditions with a clamped cursor that always moved through the original target (i.e.,  $0^\circ$  clamp). If TE alone is sufficient to elicit implicit recalibration, the participant's movement would be expected to shift in the direction of the jumped target on the subsequent trial. As a point of comparison, we also tested a condition in which both SPE and TE varied together, through separate blocks in which cursor feedback was clamped between  $\pm 16^\circ$  while the target remained stationary (SPE+TE). We expected the participant's movement would be shifted in the opposite direction of the cursor for these conditions. To ensure that learning was implicit, participants were instructed to always move directly to the original target location, ignoring both the cursor feedback and the target jump.

In trials when both SPE and TE were present, all participants exhibited robust changes in hand angle to (partially) counter the imposed error, a key signature of implicit recalibration (Figure 2c; Mean slope  $\pm$  SEM:  $\beta = -0.1 \pm 0.0$ ;  $F_{(1,212)} = 136.0$ ,  $p = 1.3 \times 10^{-24}$ ,  $\eta^2 = 0.2$ ). The change in hand angle as a function of error size appeared to be sublinear, composed of a linear zone for smaller perturbations ( $0^\circ - 4^\circ$ ) and a saturated region for larger perturbations ( $4^\circ - 16^\circ$ ), consistent with previous reports of saturated learning across a wide range of error sizes (Hayashi, Kato, & Nozaki, 2020; Kasuga, Hirashima, & Nozaki, 2013; Kim et al., 2018; Morehead et al., 2017; Wei & Kording, 2009).

A very different picture was observed in the TE-only blocks. Here participants exhibited no reliable change in hand angle in response to the TE (Figure 2d;  $\beta = 0.0 \pm 0.0$ ;  $t_{(212)} = 0.6$ ,  $p = 0.69$ ,  $D = 0.1$ ). Critically, there was a striking interaction between perturbation size and perturbation type ( $\beta = 1.2 \pm 0.1$ ;  $F_{(1,212)} = 61.1$ ,  $p = 2.5 \times 10^{-13}$ ,  $\eta^2 = 0.2$ ), where robust implicit recalibration was observed when both SPE + TE were present, but not when TE-only was provided.

As a test of generality, we examined whether TE-only perturbations would elicit implicit recalibration when all perturbation conditions were scheduled in a random manner, rather than providing TE-only and SPE+TE trials in separate blocks (see Table 3 in the Methods section). Again, robust sign-dependent changes in hand angle were observed for all participants in the SPE + TE condition (Set A:  $\beta = -0.4 \pm 0.0$ ;  $F_{(1,196)} = 138.7$ ,  $p = 1.5 \times 10^{-24}$ ,  $\eta^2 = 0.2$ ; Set B:  $\beta = -0.4 \pm 0.0$ ;  $F_{(1,196)} = 128.9$ ,  $p = 2.8 \times 10^{-23}$ ,  $\eta^2 = 0.1$ ; Figure 2d & f). In contrast, TE-only trials again failed to elicit any sign-dependent changes in hand angle (Set A:  $\beta = 0.0 \pm 0.1$ ;  $t_{(196)} = 0.5$ ,  $p = 0.62$ ,  $D = 0.1$ ; Set B:  $\beta = 0.0 \pm 0.1$ ;  $t_{(196)} = -0.4$ ,  $p = 0.72$ ,  $D = 0.1$ ; Figure 2f & h). The interaction between perturbation type and size was replicated (Set A:  $\beta = 0.4 \pm 0.0$ ;  $F_{(1,196)} = 67.5$ ,  $p = 2.9 \times 10^{-14}$ ,  $\eta^2 = 0.2$ ; Set B:  $\beta = 0.4 \pm 0.0$ ;  $F_{(1,196)} = 93.3$ ,  $p = 2.7 \times 10^{-18}$ ,  $\eta^2 = 0.3$ ), showing robust implicit recalibration when both SPE + TE were present, but not when TE-only was provided.

Together, these results indicate that TE alone is not sufficient to drive implicit recalibration. This stands in contrast to SPE, which leads to implicit recalibration whether or not TE is present (Kim et al., 2019; Leow et al., 2018; Leow, Marinovic, de Rugy, & Carroll, 2020). Moreover, these results challenge the hypothesis that SPE and TE operate *strictly* in an independent manner.

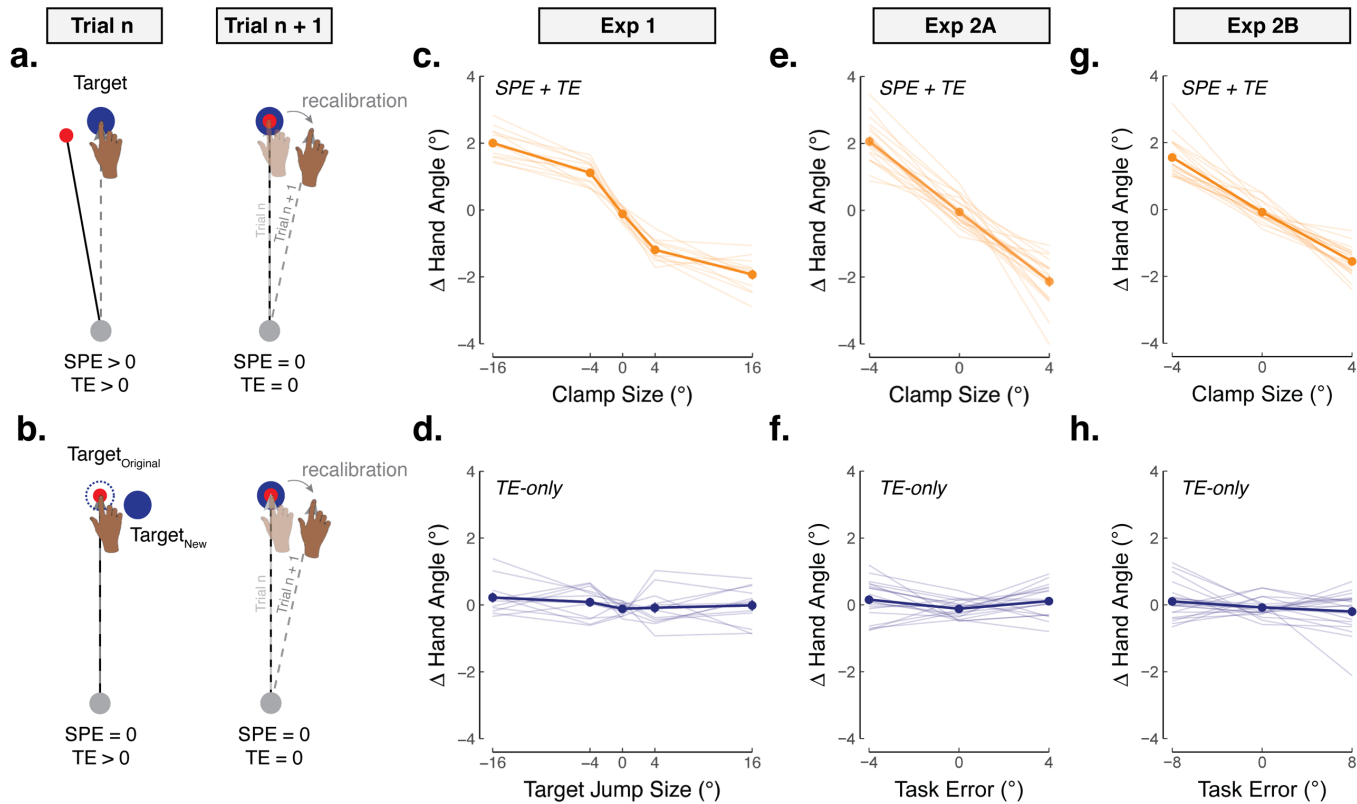

**Figure 2: Task error alone does not elicit implicit recalibration (Exp 1 – 2).** Using clamped visual feedback for testing implicit responses to: (a) SPE + TE, induced by offsetting the cursor trajectory at a fixed angle relative to the target, and (b) task error (TE), induced by jumping the target immediately after movement initiation, with the cursor clamped to  $0^\circ$  (the original target location). (c) – (d) In Exp 1, participants experienced 4 alternating blocks of target jumps and clamped feedback (201 trials/block). The perturbation sizes within a given block were randomized in order to prevent accumulated learning. Adaptation was quantified by measuring how much the hand angle changed on trial  $n + 1$  in response to the perturbation on trial  $n$ . (e) – (h) In Exp 2, participants experienced a fully randomized (mixed) schedule of target jumps (Set A with  $\pm 4^\circ$  TE-only perturbations and Set B with  $\pm 8^\circ$  TE-only perturbations) and clamped feedback (both sets with  $\pm 4^\circ$  SPE + TE perturbations). Dots connected with thick line represent the across participant average; thin lines represent individual data. Note that the x- and y-axes are not drawn on the same scale.

129  
130  
131 Although TE alone may not induce recalibration, previous work has shown that the presence or absence of TE will modulate  
132 the response to SPE (Kim et al., 2019; Leow et al., 2018, 2020). To examine this modulatory effect in greater detail,  
133 Experiment 2 also included conditions in which the size of target jumps varied with non-zero clamped feedback (see Table  
134 3). To vary the size of TE, we jumped the target between  $\pm 8^\circ$  away from the original target location. To maintain a constant  
135 non-zero SPE, we clamped the cursor at a constant  $\pm 4^\circ$  offset from the original target.

136  
137 To understand the potential outcomes from these manipulations, we considered several models that encapsulated the various  
138 ways in which TE and SPE might interact to drive learning. We first considered two basic models, one in which TE does  
139 not contribute to implicit recalibration and one in which TE and SPE make independent contributions to implicit  
140 recalibration (dual-error model). By the former, we would expect recalibration to be invariant to the size of target jumps  
141 and thus the size of TE (Figure 3a). However, this model would not jive with the attenuated response to SPE-only compared  
142 to that of SPE + TE seen in the literature (Figure 1).

143  
144 In contrast, the prediction for the independent dual-error model is straightforward, based on the cumulative effects of how  
145 the target jumps influence TE and the clamped cursor influences SPE. Jumping the target in the same signed direction as  
146 the clamped cursor (e.g., clockwise target jump and clockwise clamp) will decrease TE (jump-to, jump-past). This  
147 manipulation should decrease recalibration since SPE and TE make opposing contributions to the behavioral change.  
148 Analogously, jumping the target away from the cursor would increase TE (jump-away), and thus increase recalibration since  
149 SPE and TE now operate in a synergistic manner (Figure 3b). As noted above, however, this strictly independent dual-error  
150 model is also not supported by the results described above where TE-only does not elicit recalibration (Figures 3d, f, h).

151  
152 Given the failure of the two basic models, we considered two hypotheses in which task outcome might influence  
153 recalibration to SPE in a modulatory, interactive manner. One model is based on the hypothesis that, rather than being  
154 influenced by a directional TE, recalibration may be attenuated by a more simplistic intrinsic reward signal that signals  
155 whether or not the cursor “hits” the target (Cashaback, McGregor, Mohatarem, & Gribble, 2017; Galea, Mallia, Rothwell,  
156 & Diedrichsen, 2015; Kim et al., 2019; Konrad Paul Körding & Wolpert, 2004; Nikooyan & Ahmed, 2015). This Rewarded  
157 SPE model would predict a transient drop in adaptation for a narrow range of TE sizes when the target jumps to the cursor  
158 (Figure 3c) but would otherwise not affect learning. An alternative model is that recalibration might be modulated by the  
159 distracting presence of the target jump. In this Distracted SPE model, the extent of this attenuation might depend on the size  
160 of the target jump, predicting a symmetrical learning function with a peak at the no-jump condition (Figure 3e).

161  
162 To this point, we have considered modulatory effects when the actual behavioral change is solely driven by SPE, with TE  
163 modulating the strength of that error signal. To be comprehensive, we also posited that these modulatory effects could be  
164 combined with a direct learning response to TE, one that occurs in the presence of SPE. The right side of Figure 3 sketches  
165 the predictions of these hybrid, dual-error models (i.e., Invariant SPE + TE, Rewarded SPE + TE, Distracted SPE + TE  
166 models).

151  
152  
153  
154  
155  
156  
157  
158  
159  
160  
161  
162  
163  
164  
165  
166  
167

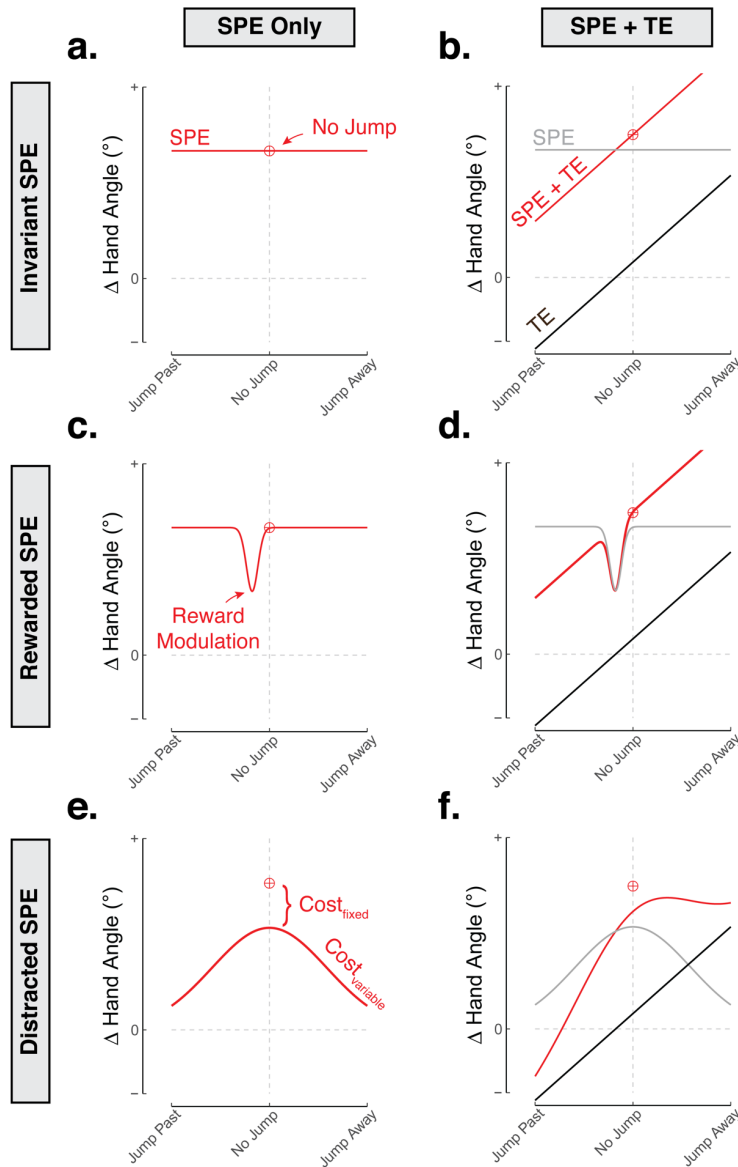

**Figure 3: Modeling the influence of target jumps on adaptation to TE and SPE.** Given a constant SPE magnitude, SPE may be (a) impervious to target jumps (b) attenuated when the cursor “hits” the target (modulated by intrinsic reward), or (c) attenuated due to the motion of the jumping target diverting attention away from computing a SPE. The attenuation is assumed to be driven by the mere presence of a target jump (fixed cost) and varied with target jump size (variable cost). Right column (b), (d), (f): Adaptation may also be driven by a TE-based learning process, assumed here to be a linear function of the distance between the feedback and new position of the target. The red indicates expected behavior, which is the composite of the SPE process (grey) and TE-based process (black).

To increase statistical power, we flipped the sign of the hand angle in the clockwise clamp conditions and counterclockwise target jump condition such that a positive change in hand angle always reflected implicit recalibration in the expected direction (i.e., change in hand angle in the opposite direction of the clamped cursor feedback). This doubled the number of trials in each clamp × target jump condition.

In response to a stationary target (i.e., no jump), participants adapted 1.5° in response to a -4° clamp (Figure 4a). When the target jumped towards the cursor, implicit recalibration was reduced in a roughly stepwise, linear manner (Table 3): Jump-to (i.e., target jumps to the cursor) reduced implicit recalibration by 13% and jump-past (i.e., target jumps in the direction of and beyond the cursor) reduced implicit recalibration by 33%. The fact that jumping the target influenced behavior argues against the Invariant SPE model; task outcome indeed influences behavior in the presence of SPE. The graded effect is also not compatible with the Rewarded SPE models (Figure 3c, d), as these models predict a modulating effect of target jumps only when the target intersects the cursor feedback, providing a putative intrinsic reward.

182  
183 Implicit recalibration was greater when the target jumped away from the cursor compared to when it jumped past ( $0.3 \pm$   
184  $0.1$ ;  $t_{(77)} = 2.6$ ,  $p = 0.01$ ,  $D = 0.8$ ) (Figure 4a; Table 1). This pattern is most consistent with the unique, asymmetrical  
185 function predicted by the Distracted SPE + TE model (Figure 3e) and refutes the symmetrical function predicted by the  
186 Distracted SPE-only model (Figure 3f). That is, implicit recalibration may be dependent on both SPE and TE (conditioned  
187 on the presence of SPE), although the act of manipulating TE via target jumps may have a distracting effect that reduces  
188 sensitivity to SPE.

189  
190 Exp 3 was designed to test this distraction prediction, a key feature of the Distracted SPE + TE model: Namely, that  
191 recalibration in response to an SPE should be attenuated by distraction, even if the distracting event does not influence TE  
192 (or SPE). To test this prediction, we included a condition where the target “jumped” *without* changing locations (jump-in-  
193 place), disappearing upon movement initiation and then reappearing in its original location on the second screen refresh.  
194 The difference between implicit recalibration for no-jump (i.e., stationary target) and jump-in-place would indicate the  
195 effect of distraction. Moreover, the magnitude of this effect should be independent of the size of the SPE. To test this  
196 prediction, we used two clamp sizes ( $\pm 3^\circ$  and  $\pm 7^\circ$ ). This experiment was conducted online in response to stay-at-home  
197 orders related to the COVID pandemic. With this setup, we were able to increase the sample size.

198  
199 On average, participants adapted  $1.1^\circ$  and  $1.5^\circ$  in response to  $-3^\circ$  and  $-7^\circ$  clamps, respectively (no jump; Figure 4b-c; Table  
200 1). As predicted by the Distracted SPE + TE model, the response was attenuated in the jump-in-place conditions, and the  
201 magnitude of this effect was similar for the two clamp sizes,  $\sim 40\%$  (no interaction:  $= 0.4 \pm 0.0$ ;  $F_{(3,294)} = 0.1$ ,  $p =$   
202  $0.96$ ,  $\eta^2 = 0$ ). After accounting for this fixed cost, we observed a striking linear effect of TE on implicit recalibration. For  
203 instance, in Exp 3A recalibration increased on average by  $0.5^\circ$  from jump-to ( $0.1^\circ$ ) to jump-in-place ( $0.6^\circ$ ), as well as from  
204 jump-in-place ( $0.6^\circ$ ) to jump-away ( $1.1^\circ$ ).

205  
206 We also replicated our in-lab results from Exp 2 using the online platform: Implicit recalibration decreased when the target  
207 jumped towards the cursor, whereas implicit recalibration was maintained when the target jumped away from the cursor  
208 (Table 1). This marked asymmetry in the change in hand angle functions and the attenuating effect of target jumps together  
209 provide strong support that jumping the target not only modulates the size of the TE, but also attenuates the extent of  
210 recalibration from SPE (Distracted SPE+TE model).

182  
183  
184  
185  
186  
187  
188  
189  
190  
191  
192  
193  
194  
195  
196  
197  
198  
199  
200  
201  
202  
203  
204  
205  
206  
207  
208  
209  
210  
211  
212



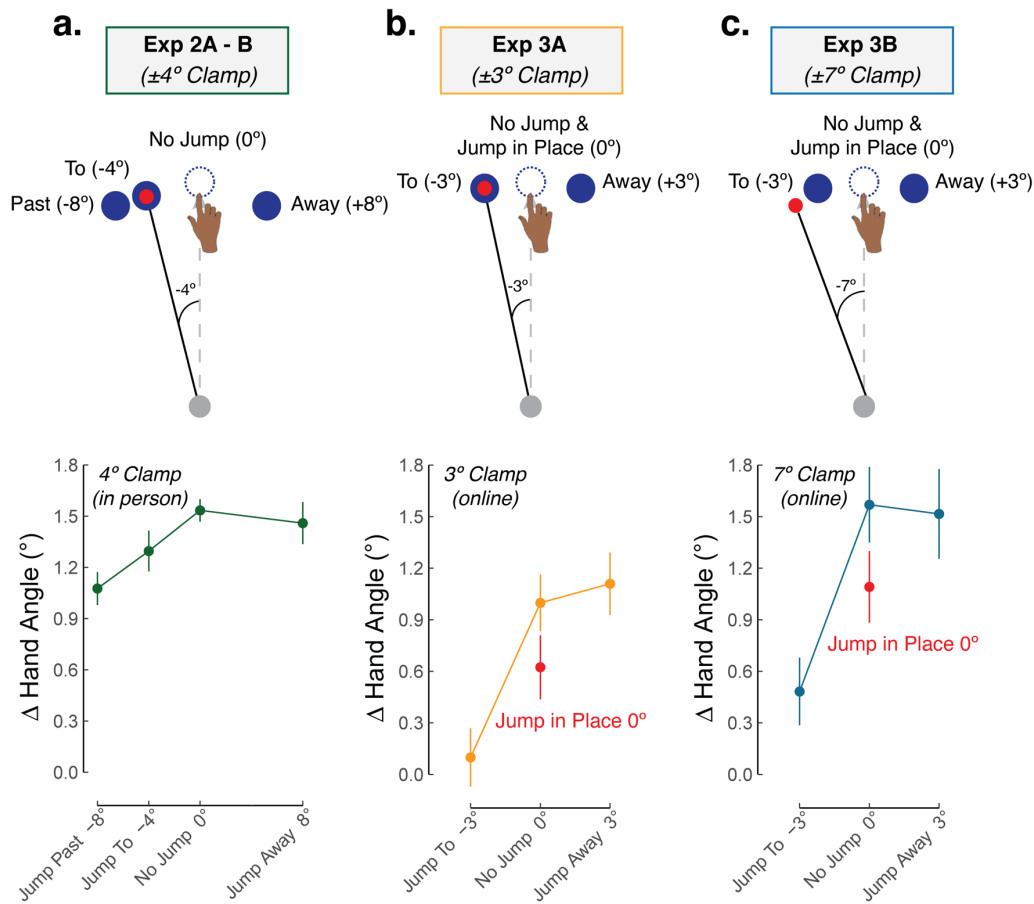

**Figure 4: Implicit recalibration is modulated by TE in the presence of SPE (Exp 2 – 3).** (a) – (c) Participants experienced a randomized zero-mean perturbation schedule where both clamp size (Exp 2, in-person:  $\pm 4^\circ$  clamp; Exp 3, online:  $\pm 3^\circ$  or  $\pm 7^\circ$ ) and target jump size (Exp 2 range: -8 to 8; Exp 3 range: -3 to 3) were varied. A positive change in hand angle signified recalibration in the expected direction, by flipping the sign of hand angles in response to counterclockwise (+) clamped feedback and clockwise (-) target jumps. Dots represent mean and vertical lines represent SEM.

| Table 1              | Exp 2A-B<br>( $\pm 4^\circ$ Clamp) |            |           |            | Exp 3A<br>( $\pm 3^\circ$ Clamp) |               |           |            | Exp 3B<br>( $\pm 7^\circ$ Clamp) |               |           |            |
|----------------------|------------------------------------|------------|-----------|------------|----------------------------------|---------------|-----------|------------|----------------------------------|---------------|-----------|------------|
| Fixed Effects        | Past                               | To         | No Jump   | Away       | To                               | Jump-in-place | No Jump   | Away       | Near                             | Jump-in-Place | No Jump   | Away       |
| Target Jump Size     | $-8^\circ$                         | $-4^\circ$ | $0^\circ$ | $+8^\circ$ | $-3^\circ$                       | $0^\circ$     | $0^\circ$ | $+3^\circ$ | $-3^\circ$                       | $0^\circ$     | $0^\circ$ | $+3^\circ$ |
| Mean (SEM)           | 1.1 (0.1)                          | 1.3 (0.1)  | 1.5 (0.1) | 1.4 (0.1)  | 0.1 (0.2)                        | 0.6 (0.2)     | 1.0 (0.2) | 1.1 (0.2)  | 0.5 (0.2)                        | 1.1 (0.2)     | 1.5 (0.2) | 1.5 (0.2)  |
| Mean – No Jump (SEM) | -0.5 (0.1)                         | -0.2 (0.1) |           | -0.1 (0.1) | -1.0 (0.2)                       | -0.4 (0.2)    |           | 0.0 (0.2)  | -1.0 (0.2)                       | -0.4 (0.2)    |           | 0.0 (0.2)  |
| <i>D</i>             | -1.0                               | -0.4       |           | -0.2       | -0.8                             | -0.3          |           | 0.0        | 0.3                              | 0.2           |           | 0.1        |
| <i>P</i>             | <0.001                             | 0.14       |           | 0.42       | <0.001                           | 0.02          |           | 0.88       | <0.001                           | 0.02          |           | 0.88       |

**Table 1: Summary of model-free results.** Mean estimates (SEM) from the linear mixed effect model for each target jump condition. Changes in hand angle in response to counterclockwise (+) clamped feedback were flipped to clockwise (-), such that a positive change in hand angle always signify adaptation in the expected direction (i.e., away from the clamped feedback). Contrasts between no jump and other target jump conditions are also shown, with Cohens' D and P values provided. Significant contrasts ( $P < 0.05$ ) are highlighted in a shaded light-grey box.

214 To further probe how the distracting effect of target jumps interacts with the magnitude of TE, we sampled a wide range of  
215 target jump sizes in Experiment 4 (Figure 5a). We again observed a marked asymmetry in the learning function (Figure 4b):  
216 Implicit recalibration decreased when the target jumped towards the cursor and remained relatively invariant when the target  
217 jumped away from the cursor, even as far as 30° (jump-away). This phenomenon could be attributed to the contribution of  
218 a TE process that offsets the attentional costs of target jumps on a SPE-based implicit recalibration process.

219  
220 Sampling a wider range of target jumps also allowed us to fit our candidate models to the data (see formalization in Table  
221 4 of the Methods section). In doing so, we could quantitatively evaluate how well our six candidate models fit the data while  
222 taking into account model complexity. Consistent the qualitative assessments described above, the Distracted SPE + TE  
223 model provided the best fit, having the highest  $R^2$  and lowest AIC (Table 2).

224  
225 The modeling work also allowed us to evaluate the best fitting parameters of the Distracted SPE + TE model. The parameter  
226 values suggest that TE may contribute to learning. The slope ( $\beta_{TE}$ ) of the TE function was  $0.02 \pm 0.003$ , suggesting that  
227 of the 0.5° change in hand angle observed for the 3° no-jump condition (where both SPE and TE are present), ~12% of the  
228 change came from TE. Similarly, when the error increased to 7° in a no-jump condition, ~16% of the 0.09° change in hand  
229 angle came from TE. These results indicate that SPE has a much larger impact on implicit adaptation compared to TE.

230  
231 The Distracted SPE + TE model has two parameters to capture the effects of perturbing the target. First there is a fixed  
232 effect arising from the transient changes that occur when the target is perturbed. The estimate of this parameter ( $C_j$ ) in the  
233 best fitting model was  $0.84 \pm 0.13$ . Thus, the mere perturbation of the target, even if it was not spatially displaced reduced  
234 recalibration by 15%. Second there is a variable cost ( $\sigma_d^2$ ) due to SPE-based learning being attenuated as the target jump  
235 distance increased. The estimate of this parameter was  $11.8 \pm 2.3$ . From this value, SPE would no longer be effective in  
236 driving implicit recalibration for target jumps greater than 35°.

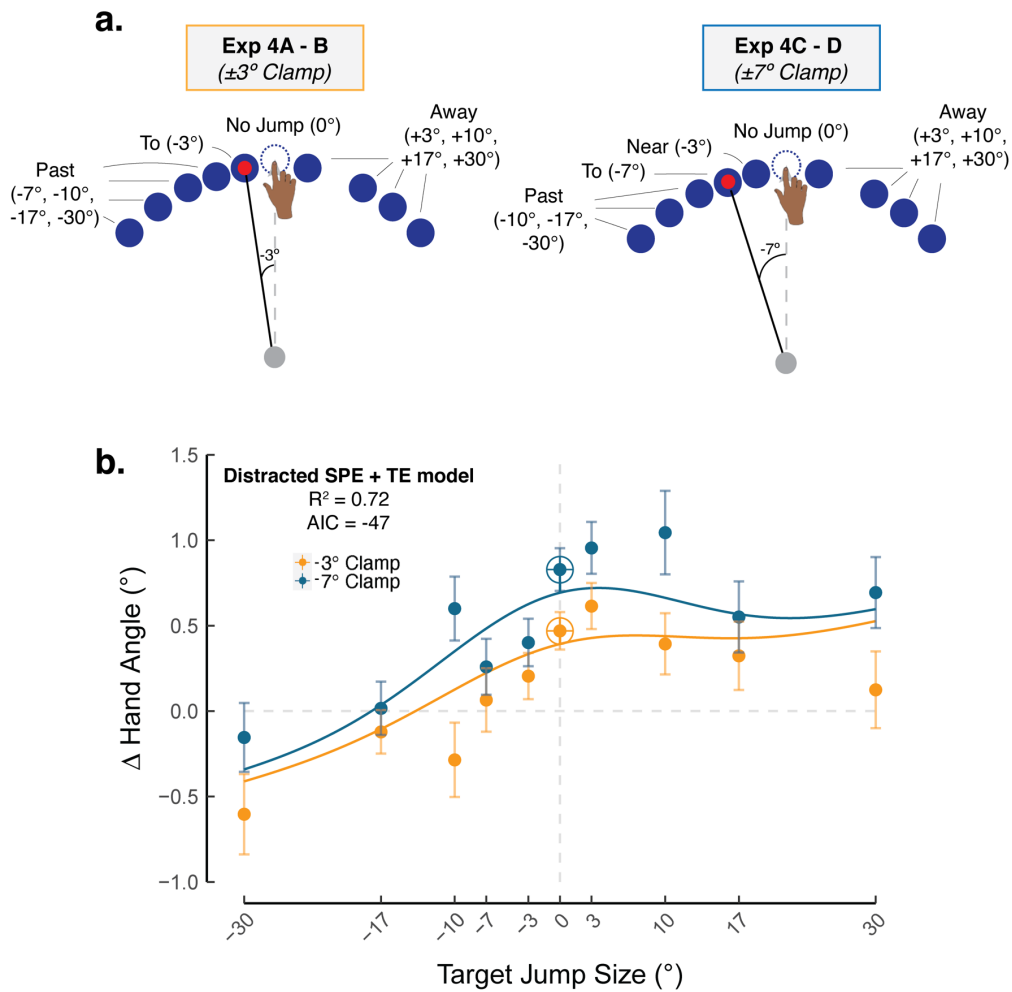

**Figure 5: Implicit recalibration reflects the contribution of learning from task error and sensory prediction error, with the latter sensitive to distraction from target jumps (Exp 4).** (a-b) Participants experienced a randomized zero-mean perturbation schedule with clamp sizes ( $-3^\circ$  shown in orange;  $-7^\circ$  shown in blue)  $\times$  target jumps (x axis,  $-30^\circ$  through  $30^\circ$ ). The Distracted SPE + TE model was the winning model.

| Table 2        | SPE Only        |       |     | SPE + TE        |       |     |
|----------------|-----------------|-------|-----|-----------------|-------|-----|
|                | # of free param | $R^2$ | AIC | # of free param | $R^2$ | AIC |
| Invariant SPE  | 0               | -0.54 | -18 | 1               | -0.54 | -18 |
| Rewarded SPE   | 2               | 0.15  | -28 | 3               | 0.53  | -37 |
| Distracted SPE | 2               | 0.33  | -33 | 3               | 0.72  | -47 |

**Table 2: Summary of model-based results.**

## Discussion

Although it is widely recognized that implicit sensorimotor recalibration serves to minimize motor execution errors, the error signals that drive this learning process remain the subject of considerable debate (Kim et al., 2020; John W. Krakauer et al., 2019; Shadmehr et al., 2010). In particular, the idea that sensory prediction error (SPE), the mismatch between the expected and actual feedback, is the sole learning signal has been challenged by recent evidence demonstrating that task error (TE), the mismatch between the target location and feedback may also impact implicit recalibration (Albert et al., 2020; Kim et al., 2019; Leow et al., 2018; Miyamoto, Wang, & Smith, 2020). Whether these two types of error drive implicit recalibration independently or interactively remains unknown.

In traditional sensorimotor adaptation tasks, SPE and TE are confounded. Displacing the hand in a force field or perturbing the feedback in a visuomotor rotation task introduces both SPE and TE. To unconfound these signals, researchers have developed methods that selectively influence one signal or the other. For example, by making the angular trajectory of the feedback cursor independent of the movement, an SPE of a fixed size may either be accompanied by TE (when the target is small, and the cursor misses the target) or occur without TE (when the target is large, and the cursor hits the target). Conversely, displacing the target (i.e., target jump) selectively modulates TE given the assumption that the expected location of the feedback remains at the original target location.

Building on these methodological advances, we designed a series of experiments to systematically manipulate SPE and TE and used the data to test a set of computational models. We first considered a model in which these two types of error make independent contributions to implicit recalibration, with the resultant behavior being the composite operation of two distinct learning processes (Figure 3a, b). This idea takes inspiration from the work of Mazzoni and Krakauer (2006) who showed that implicit recalibration continued to operate even in the absence of task error, a result that suggests SPE-dependent learning is modular. A natural extension of this modular, dual-error model would posit that TE alone should also be sufficient to drive implicit recalibration. In three experiments, we failed to find support for this hypothesis. When the clamped feedback moved directly to the original target location (no SPE), hand angle remained unchanged in response to target jumps. That is, TE in the absence of SPE failed to induce implicit recalibration, arguing against models in which SPE-dependent and TE-dependent learning processes operate in a strictly independent manner.

Given the failure of this simple model and the dependency of TE on SPE, we considered different ways in which SPE-dependent and TE-dependent processes might interact. We varied task outcome in a continuous manner by jumping the target, either away from the perturbed cursor (increasing TE), towards the perturbed cursor (reducing TE), or to the location of the perturbed cursor (nullifying TE; i.e., SPE only). In stark juxtaposition to the failure of TE only to elicit implicit recalibration, SPE only reliably elicited implicit recalibration, which is a finding consistent with previous literature (Kim et al., 2019; Leow et al., 2018, 2020).

By modulating TE in a fine-grained, continuous manner, we revealed an unexpected, asymmetrical effect on implicit recalibration: Implicit recalibration decreased when TE decreased yet remained largely unaffected when TE increased. These results are at odds with the hypothesis that task outcome provides a *binary* reward signal (Figure 3c, d), with TE being present when the cursor misses the target and TE being absent when the cursor hits the target (Cashaback et al., 2017; Galea et al., 2015; Kim et al., 2019; Konrad Paul Körding & Wolpert, 2004; Nikooyan & Ahmed, 2015). This asymmetrical function is also at odds with the hypothesis where SPE-learning, the sole process driving implicit recalibration, is attenuated by a generic distractor effect of displacing the target (Figure 3e).

Instead, the pattern of results supports a hybrid model, where implicit recalibration is driven by both TE and SPE, with each error signal having a modulatory effect on the other error signal (Figure 3f). Implicit recalibration scales with the size of TE, but only when SPE is also present. Implicit recalibration also scales with the size of SPE but is attenuated when the target is perturbed. We hypothesize that this specific modulation of SPE-based learning occurs because the target displacement captures attention, an effect that increases with the size of the displacement. Taken together, this hybrid model underscores the rich, dynamic interplay between two distinct error signals that drive implicit recalibration in an interactive manner.

While implicit recalibration seems to scale with TE in the presence of SPE, it remains unclear why TE alone fails to elicit recalibration. One possibility is that SPE serves as a gating signal, with recalibration only engaged in the presence of SPE and then responding to all sources of error information. Alternatively, the lack of an SPE may allow the brain to correctly attribute the target jump to an external cause (Konrad P. Körding et al., 2007; Shams & Beierholm, 2010; Wei & Körding,

298 2009). In contrast, when a TE occurs in the presence of an SPE, the brain may be less confident in attributing the error to  
299 an external cause and, as such, use both sources of information to recalibrate the sensorimotor system. This latter hypothesis  
300 might account for the recent findings of Ranjan and Smith (2020) who observed robust adaptation in response to TE alone,  
301 a result at odds with the current study. Whereas our participants were told to ignore the manipulations of the cursor and the  
302 target, Ranjan and Smith instructed participants to hit the target with their cursor. These instructions may have rendered the  
303 position of the displaced target and the cursor relevant, thereby motivating participants to recruit more explicit re-aiming  
304 strategies to reduce TE (Oza, Kumar, & Mutha, 2020).

305  
306 The current study also highlights an important methodological issue. Similar to the way error clamps have provided a tool  
307 to isolate implicit recalibration, target jumps have been viewed as a way to provide a “pure” manipulation of TE. However,  
308 our results show an attenuated effect on implicit recalibration from the transient effects associated with perturbing the target,  
309 a result made salient by the conditions in which the target briefly disappeared and then reappeared at its original location.  
310 The transient sensory events associated with a target jump or flash might siphon attention away from the visual feedback,  
311 thereby weakening the overall learning signal. Alternatively, a transient distraction may have increased the likelihood that  
312 visual feedback is mis-localized, thus attenuating the motor system’s reliance on this uncertain feedback (Burge, Ernst, &  
313 Banks, 2008; Konrad P. Körding & Wolpert, 2004; Tsay, Avraham, et al., 2020; Wei & Körding, 2010). Regardless of the  
314 mechanism, our results underscore the importance of considering the distractive effect of a target jump manipulation and  
315 the consequences of this on implicit recalibration.

## 316 **Methods:**

### 317 *Participants and Apparatus*

318 All participants were between 18 – 30 years old and right-handed, as determined by either the Edinburgh handedness  
319 inventory (Oldfield, 1971) or through self-report. The protocol was approved by the IRB at University of Delaware and UC  
320 Berkeley.

321 In-person participants (Exp 1 – 2): Undergraduate students were recruited from the University of Delaware community,  
322 receiving financial compensation for their participation at a rate of \$10/hour. Participants were seated in front of a custom  
323 tabletop setup and held the handle of a robot manipulandum (KinArm: BKIN Technologies, sampling rate 200 Hz) that was  
324 positioned below a mirror. Visual feedback was projected by a monitor placed directly above onto the mirror, which  
325 occluded vision of the participant’s hand during the experiment. Peripheral vision of the arm was minimized by  
326 extinguishing the room lights. Participants completed the task by moving the robot manipulandum, which was constrained  
327 to a horizontal 2D plane.

328 Online participants (Exp 3 – 4): Participants were recruited via Amazon Mechanical Turk, receiving financial compensation  
329 for their participation at a rate of \$8/hour. Participants used their own laptop computer to access a customized webpage  
330 (Jonathan S. Tsay, Lee, Ivry, & Avraham, 2021) hosted on Google Firebase (sampling rate typically ~60 Hz) (Anwyl-Irvine,  
331 Dalmaijer, Hodges, & Evershed, 2020; Bridges, Pitiot, MacAskill, & Peirce, 2020). Recruitment was restricted to trackpad  
332 users to minimize variability from different response devices. Participants completed the task by swiping their index finger  
333 on the trackpad.

### 334 *Reaching Task Procedure*

335 In-person procedure: Reaches were made from a start location to one target (90° location, straight ahead). The start location  
336 was indicated by a white ring (6 mm diameter) and the target by a blue circle (6 mm diameter), with the radial distance  
337 between the start location and target fixed at 10 cm. To initiate a trial, the robot arm moved the participant’s hand to the  
338 start location. Visual feedback of the hand position was given via a cursor (white circle 3.5 mm diameter) only when the  
339 hand was within 1 cm of the start position. Once the hand remained within the start location for 500 ms, the target appeared,  
340 serving as a cue to indicate the location of the target and an imperative to initiate the reach. To discourage on-line corrections,  
341 participants were instructed to perform fast, ‘shooting’ movements through the target as soon as the target appeared.

342 Reaction time (RT) was defined as the time from initial target presentation to the start of movement (defined as when the  
343 hand first exceeded 5 cm/s for at least 50 milliseconds). Movement time (MT) was defined as the time between the start of  
344 movement and when the hand crossed the radial target distance of 10 centimeters. To ensure that participants moved at a  
345 fast speed that excluded online feedback corrections, the message “Too Slow” appeared on the screen at the end of the trial  
346 when MT was < 40 cm/s at peak velocity. We also presented the message “Too Fast” if MT was > 70 cm/s at peak velocity  
347 to ensure that participants did not make simple ballistic movements in the general direction of the target (this criterion was  
348 rarely exceeded). After completing the reach, the participant was instructed to keep the arm and shoulder relaxed as the  
349 robot moved the hand back to the starting position.

350 Online procedure: The reaching task was adapted for an online study. We did not obtain information concerning the monitors  
351 used by each participant; as such, we cannot specify the exact size of the stimuli. However, from our experience in  
352 subsequent studies, we assume that most online participants used a laptop computer. To provide a rough sense of the  
353 stimulation conditions, we assume that the typical monitor had a 13” screen with a width of 1366 pixels and height of 768  
354 pixel (Anwyl-Irvine et al., 2020). The center position was indicated by a white circle (0.5 cm in diameter) and the target  
355 location was indicated by a blue circle (also 0.5 cm in diameter). To ensure that reaches remain in the trackpad, we reduced  
356 the radial distance of the target to 6 cm and positioned the target at the 45° target (upper right quadrant).

357 The participant made center-out planar movements by moving the computer cursor with her trackpad to a visual target. To  
358 initiate each trial, the participant moved their hand to the start location. Visual feedback of the hand position was given via  
359 a cursor (white circle 0.5 cm diameter) when the hand was within 1 cm of the start position. Once the hand remained within  
360 the start location for 500 ms, the target appeared, serving as a cue to indicate the location of the target and an imperative to  
361 initiate the reach. To discourage on-line corrections, participants were instructed to perform fast, ‘shooting’ movements  
362 through the target as soon as the target appeared.

RT was defined as the time from initial target presentation to the start of movement (i.e., when the hand movement exceeded 1 cm from the start location). Due to the lower sampling rate of standard computer monitors compared to in-person setup, we opted to define RT in terms of movement distance (requiring fewer samples) rather than movement velocity (requiring more samples to adequately estimate). There were no constraints on RT. MT was defined as the time between the start of the movement and when the radial distance of the movement reached 6 cm. To ensure that the movements were made quickly, the computer displayed a “too slow” message if MT exceeded 300 ms. We did not include a “too fast” message since participants recruited online, based on our pilot results, err on the side of moving too slowly.

There were three types of cursor feedback trials used throughout the in-person and online experiments: On veridical feedback trials, the cursor corresponded to the position of the hand. On clamped feedback trials, the cursor followed an invariant path along a constant angle with respect to the target. The radial distance of the cursor, relative to the start position, was yoked to the participant’s hand. In both types of feedback trials, the radial position of the cursor matched the radial position of the hand until the movement amplitude reached the radial distance of the target, at which point the cursor froze for 50 ms. On no-feedback trials, the cursor was blanked when the target appeared, and did not re-appear until the participant had completed the reach and returned to the start location for the next trial.

There were also target jump trials, where upon movement initiation (i.e., in-person: velocity > 5 cm/s; online: radial distance > 1 cm), the original target was blanked and immediately re-positioned at a new target location (i.e., one screen refresh between offset of original target to onset of new target; in-person: within 1 ms; online: <15 ms, accounting for the delay in the monitor system (Anwyl-Irvine et al., 2020; Bridges et al., 2020)). We varied the size of the target jump and categorized these based on the relative position of the new target location to the clamped cursor position: jump-past, jump-to, jump-near, jump-away, and jump-in-place. When the target jumps in the direction of the the clamped cursor feedback, the size of the target jump could either be greater than (jump-past), equal to (jump-to), or less than (jump-near) the clamped angle. On jump-away trials, the target was repositioned in the direction opposite to the clamped feedback. On jump-in-place trials, the target disappeared upon movement initiation (1 refresh) and then reappeared (1 refresh) in the same (original) location (<30 ms, accounting for delays in the system). While jump-in-place has a longer interval between successive displays of the target compared to other target jump conditions, this interval ensured that jump-in-place trials elicited a detectable disturbance to the visual display, something that was obvious in the other target jump conditions.

| Table 3 | N   | Setting           | Perturbation Conditions |                |                                   |        |
|---------|-----|-------------------|-------------------------|----------------|-----------------------------------|--------|
|         |     |                   | Set                     | Clamp size (°) | Target jump (°)                   | Figure |
| Exp 1   | 12  | In-Person         | —                       | 0, ±4, ±16     | 0                                 | 2c     |
|         |     |                   |                         | 0              | 0, ±4, ±16                        | 2d     |
| Exp 2   | 40  | In-Person         | A                       | -4             | 0, -4, -8                         | 2e, 3a |
|         |     |                   |                         | +4             | 0, +4, +8                         |        |
|         |     |                   | B                       | 0              | 0, ±4                             | 2f     |
|         |     |                   |                         | ±4             | 0, ±8                             | 2g, 3a |
|         |     | 0                 | 0, ±8                   | 2h, 3a         |                                   |        |
| Exp 3   | 100 | Online            | A                       | ±3             | ±3, 0, 0 <sub>jump-in-place</sub> | 3b     |
|         |     |                   | B                       | ±7             | ±3, 0, 0 <sub>jump-in-place</sub> | 3c     |
| Exp 4   | 210 | Online            | A                       | +3             | -10, -3, 0, +3, +7, +10, +17      | 4b     |
|         |     |                   |                         | -3             | +10, +3, 0, -3, -7, -10, -17      |        |
|         |     |                   | B                       | +7             | -10, -3, 0, +3, +7, +10, +17      |        |
|         |     |                   |                         | -7             | +10, +3, 0, -3, -7, -10, -17      |        |
|         |     |                   | C                       | ±3             | ±0, ±10, ±17, ±30                 |        |
| D       | ±7  | ±0, ±10, ±17, ±30 |                         |                |                                   |        |

Table 3: Summary of experiments.

#### Experiment 1 – 2, In-person Experiments

Reaching trials were performed to the 90° target (straight ahead). The experiment began with 100 baseline reaching trials with veridical feedback, provided to familiarize the participants with the reaching task. These trials were used to emphasize

that movements should “shoot” through the target and demonstrate that the feedback and target would disappear soon after the movement amplitude exceeded the radial distance of the target.

The participant then completed a block of perturbation trials. Just before the start of this block, the error clamp and target jump manipulations were described to the participant, and she was told to ignore the cursor “feedback” as well as any change in the position of the target, always attempting to reach directly to the original target. To help the participant understand the task irrelevant nature of the clamped feedback and target jump, three demonstration trials were provided. The target appeared straight ahead at 90° and the participant was told to reach to the left (demo 1), to the right (demo 2), and backward (demo 3). The cursor moved in a straight line with a 45° offset from the original target in all three trials, and the target “jumped” upon movement initiation 0° (demo 1), 45° (demo 2), and 90° (demo 3) away from the original target.

In Exp 1, the perturbation block was composed of mini-blocks (Table 3; 804 perturbation trials = 4 mini-blocks x 201 trials/mini-block) of either SPE + TE perturbations (i.e., when clamped feedback is paired with a stationary target) or TE-only perturbations (i.e., when a 0° clamp is paired with a target jump). We opted to keep these perturbation conditions separate to minimize any interference or generalization of learning from one trial type to another (Dang, Parvin, & Ivry, 2019; J. W. Krakauer, Ghilardi, & Ghez, 1999; Lerner et al., 2020). SPE + TE and TE-only mini-blocks were interleaved, with the order counterbalanced across individuals. Within each mini-block, there were 20 trials per condition provided in a random, zero-mean order (with the exception of 21 trials for 0° clamp x 0° target jump). This resulted in 80 trials per clamp size x target jump combination across the entire experiment (84 trials in the 0° clamp, 0° target jump condition).

The perturbation block in Exp 2 was not composed of mini-blocks. Instead, we opted to randomize all perturbation conditions across the entire experiment (724 trials) to evaluate whether our results from Exp 1 would hold under another perturbation schedule. To sample a wider range of clamp size x target jump combinations while keeping the experiment within 1 hour to minimize fatigue, participants experienced different sets of perturbations (Set A or Set B). In Set A, the target always jumped in the same direction as the error clamp, while in Set B, the target either jumped in the same or in the opposite direction of the error clamp (Table 3). There were 80 trials per clamp size x target jump combination (84 trials for the 0° clamp, 0° target jump condition).

### *Experiment 3 – 4, Online Experiments*

Due to the onset of the pandemic, Exp 3 – 4 were conducted online. With this approach, we were able to increase our sample size in an efficient manner, providing greater power to detect subtle differences between target jump conditions. We used an motor learning platform (OnPoint) (Tsay et al., 2021) and recruited participants using Amazon Mechanical Turk. Despite substantial differences between in-person and online sensorimotor learning experiments (e.g., in-person: dark room to occlude vision of the hand; online: full visibility of the hand for trackpad users), we have found that the results obtained online are quite similar to those obtained in-person (Tsay et al., 2021).

We made several additional changes to the experiment. We included “attention checks” to verify whether participants attended to the task. Specifically, during the inter-trial interval, participants occasionally were instructed to make an arbitrary response (e.g., “Press the letter “b” to proceed.”). If participants failed to make the specified keypress, the experiment was terminated. These attention checks were randomly introduced within the first 50 trials of the experiment. We also included “instruction checks” after our three demo trials to assess whether participants understood the nature of the error clamp and target jump manipulations: “Identify the correct statement. Press 'a': I will aim away from the original target. I will ignore the white dot. Press 'b': I will aim directly towards the original target location and ignore the white dot.” The experiment was terminated if participants failed to make an accurate keypress (i.e., “b”).

The block structure in Exp 3 and 4 were the same, composed of a baseline block with veridical feedback (28 trials) and a perturbation block with clamp feedback paired with target jumps (Exp 3: 120 trials; Exp 4: 252 trials). All perturbation conditions were randomized in a zero-mean manner throughout the experiment. The perturbation conditions were again divided into sets (See Table 1; Exp 3: Sets A—B; Exp 4: Sets A—D) to sample a wider range of clamp size x target jump combinations, while keeping the experiment within 1 hour. There were 30 trials per clamp size x target jump combination in Exp 3 and 18 trials per combination in Exp 4.

### *Data analysis, Model Free*



163 The primary dependent variable of reach performance was the hand angle, defined as the hand position relative to the target  
164 when the movement amplitude reached the target distance (i.e., angle between the lines connecting start position to target  
165 and start position to hand).

166  
167 Outlier responses were defined as trials in which the hand angle deviated by more than 3 standard deviations from a moving  
168 5-trial window. These outlier trials were excluded from further analysis, since behavior on these trials could reflect  
169 attentional lapses or anticipatory movements to another target location (average percent of trials removed per participant  $\pm$   
170 SD: Exp 1:  $0.2 \pm 0.2\%$ ; Exp 2:  $0.1 \pm 0.2\%$ ; Exp 3:  $0.8\% \pm 0.8\%$ ; Exp 4:  $1.1 \pm 0.1\%$ ).

171  
172 As a measure of trial-by-trial implicit recalibration, we evaluated each participant's median change in hand angle on trial  $n$   
173  $+ 1$ , as a function of the perturbation condition (clamp size  $\times$  target jump) on trial  $n$  ( $\Delta$  Hand Angle).

174  
175 We sought to determine whether SPE + TE and TE-only perturbations elicit robust sign-dependent changes in hand angle  
176 (Exp 1 and 2). Specifically, in the SPE + TE condition, we expect implicit recalibration to result in a change in hand angle  
177 in the opposite direction of the error clamp (e.g., a CW clamp eliciting a CCW change in hand angle). In contrast, in the  
178 TE-only condition, we expect implicit recalibration to be in the same direction as the target jump (e.g., a CW target jump  
179 eliciting a CW change in hand angle). To better visualize the difference between SPE + TE and TE-only conditions, the  
180 sign of the target jump was flipped, such that the expected change in hand angle would also be in the opposite direction of  
181 the perturbation (i.e., a negative target jump would elicit a positive change in hand angle). Each participants' data were  
182 submitted to a linear regression with perturbation size (Exp 1:  $0, \pm 4^\circ, \pm 16^\circ$ ; Exp 2, Set A:  $0, \pm 4^\circ$ ; Exp 2, Set B:  $0, \pm 4^\circ, \pm 8^\circ$ )  
183 and perturbation type (clamp vs target jump) as main effects. The mean regression slopes ( $\beta$ )  $\pm$  SEM across participants  
184 were provided.

185  
186 To ask whether the effect of TE would be conditional on the presence of SPE, we submitted each participants' data in Exps  
187 2 and 3 to a linear regression with target jump size and task set as main effects. Post-hoc contrasts were performed using  
188 two tailed t-tests, and P values were Bonferroni corrected. The mean regression values ( $\beta$ )  $\pm$  SEM across participants were  
189 provided.

#### 190 191 *Data analysis, Model Based*

192  
193 In this section, we formalize the six models described in the Introduction (Figure 1). The development of these models was  
194 based on different assumptions about how the size of target jumps ( $\theta_j$ ) and the size of the error clamp ( $\theta_c$ ) impact the  
195 processing of SPE and TE.

196  
197 The first set of models posit that the motor system responds only to SPE (Table 4: SPE only column): First, SPE may be  
198 impervious to target jumps (Invariant SPE), where motor updates are not affected by target jumps ( $U_{\theta_j=0}$ , or the motor  
199 update during no-jump). Second, SPE may be attenuated when the cursor lands in the target, modulated by intrinsic reward  
200 (Rewarded SPE). The amount of reward modulation could vary with  $\gamma_r$ , a gain value determining the amount of attenuation,  
201 and  $\sigma_r$ , the standard deviation of reward function determining the scope of attenuation. Third, SPE may be attenuated due  
202 to a distracting effect of target jumps, which may siphon attention away from processing feedback and/or the movement  
203 goal (Distracted SPE). The attenuation may be due to the presence of a target jump (a fixed cost,  $C_j$ ) and the size of the  
204 target jump (variable cost, modeled as a gaussian decay with standard deviation  $\sigma_d$ ). We recognize that the distracted SPE  
205 hypothesis may take on a different form, where there may only be a fixed cost or only be a variable cost (or a different type  
206 of variable cost, like an inverted gaussian). However, these models fail to qualitatively capture our results, and therefore,  
207 we opted not to include these models in our formal analysis. We also recognize that, at present, we only consider how target  
208 jump impacts SPE, whereas target jumps may also impact on TE.

209  
210 Alternatively, implicit recalibration may also be driven by both SPE and TE-based learning processes (Table 4: SPE + TE).  
211 The contribution of TE was assumed to vary with the distance between the cursor feedback and the new target position in a  
212 linear fashion.  $\beta_{TE}$  captures the slope of this function, and the  $\theta_c - \theta_j$  term constrains implicit recalibration from TE to 0  
213 when TE is 0 (i.e., when the target jumps onto the cursor feedback). This model assumes the net motor update ( $U_{Total}$ ) to  
214 be the sum of a SPE-based learning process ( $U_{SPE}$ ) and a TE based learning process ( $U_{TE}$ ). However, we recognize that  
215 these two processes may in fact interact in a multiplicative manner.

216

| Table 4        | SPE Only                                                                               | SPE + TE                                                                     |
|----------------|----------------------------------------------------------------------------------------|------------------------------------------------------------------------------|
| Invariant SPE  | $U_{SPE} = U_{\theta_j=0}$                                                             | $U_{Total} = U_{TE} + U_{SPE}$<br>$U_{TE} = \beta_{TE}(\theta_c - \theta_j)$ |
| Rewarded SPE   | $U_{SPE} = U_{\theta_j=0} - \gamma_r e^{-\frac{(\theta_c - \theta_j)^2}{2\sigma_r^2}}$ |                                                                              |
| Distracted SPE | $U_{SPE} = (U_{\theta_j=0} - C_j) e^{-\frac{(\theta_j)^2}{2\sigma_d^2}}$               |                                                                              |

**Table 4: Summary of models.** Parameters could either be free (red) or fixed (black, based on empirical data in Exp 4).

517  
518 We evaluated the six models by simultaneously fitting group-averaged data for both  $\pm 3^\circ$  and  $\pm 7^\circ$  clamp groups in Exp 4.  
519 To quantify model performance, we calculated  $R^2$  and AIC (Akaike Information Criterion) scores. The winning model was  
520 the model with the largest  $R^2$  and the smallest AIC. In order to calculate confidence intervals for the parameter estimates,  
521 we applied standard bootstrapping techniques, constructing group-averaged hand angle data 1000 times by randomly  
522 resampling with replacement from the pool of participants within each group. We started with 10 different initial sets of  
523 parameter values and estimated parameter values that minimized the least squared error between the bootstrapped data and  
524 the model output.

## References

- Albert, S. T., Jang, J., Haith, A. M., Lerner, G., Della-Maggiore, V., Krakauer, J. W., & Shadmehr, R. (2020). Competition between parallel sensorimotor learning systems (p. 2020.12.01.406777). doi:10.1101/2020.12.01.406777
- Anguera, J. A., Reuter-Lorenz, P. A., Willingham, D. T., & Seidler, R. D. (2010). Contributions of spatial working memory to visuomotor learning. *Journal of Cognitive Neuroscience*, 22(9), 1917–1930.
- Anwyl-Irvine, A. L., Dalmaijer, E. S., Hodges, N., & Evershed, J. (2020). *Online Timing Accuracy and Precision: A comparison of platforms, browsers, and participant's devices*. doi:10.31234/osf.io/jfec
- Benson, B. L., Anguera, J. A., & Seidler, R. D. (2011). A spatial explicit strategy reduces error but interferes with sensorimotor adaptation. *Journal of Neurophysiology*, 105(6), 2843–2851.
- Bridges, D., Pitiot, A., MacAskill, M. R., & Peirce, J. W. (2020). The timing mega-study: comparing a range of experiment generators, both lab-based and online. *PeerJ*, 8, e9414.
- Burge, J., Ernst, M. O., & Banks, M. S. (2008). The statistical determinants of adaptation rate in human reaching. *Journal of Vision*, 8(4), 20.1-19.
- Butcher, P. A., Ivry, R. B., Kuo, S.-H., Rydz, D., Krakauer, J. W., & Taylor, J. A. (2017). The cerebellum does more than sensory prediction error-based learning in sensorimotor adaptation tasks. *Journal of Neurophysiology*, 118(3), 1622–1636.
- Cameron, B. D., Franks, I. M., Inglis, J. T., & Chua, R. (2010a). Implicit motor learning from target error during explicit reach control. *Experimental Brain Research*, 206(1), 99–104.
- Cameron, B. D., Franks, I. M., Inglis, J. T., & Chua, R. (2010b). Reach adaptation to explicit vs. implicit target error. *Experimental Brain Research*, 203(2), 367–380.
- Cashaback, J. G. A., McGregor, H. R., Mohatarem, A., & Gribble, P. L. (2017). Dissociating error-based and reinforcement-based loss functions during sensorimotor learning. *PLoS Computational Biology*, 13(7), e1005623.
- Dang, K. V., Parvin, D. E., & Ivry, R. B. (2019). *Exploring Contextual Interference in Implicit and Explicit Motor Learning* (p. 644211). doi:10.1101/644211
- Day, K. A., Roemmich, R. T., Taylor, J. A., & Bastian, A. J. (2016). Visuomotor Learning Generalizes Around the Intended Movement. *ENeuro*, 3(2). doi:10.1523/ENEURO.0005-16.2016

- 552 Donchin, O., Francis, J. T., & Shadmehr, R. (2003). Quantifying generalization from trial-by-trial behavior of adaptive  
553 systems that learn with basis functions: theory and experiments in human motor control. *The Journal of*  
554 *Neuroscience: The Official Journal of the Society for Neuroscience*, 23(27), 9032–9045.
- 555 Galea, J. M., Mallia, E., Rothwell, J., & Diedrichsen, J. (2015). The dissociable effects of punishment and reward on motor  
556 learning. *Nature Neuroscience*, 18(4), 597–602.
- 557 Gonzalez Castro, L. N., Monsen, C. B., & Smith, M. A. (2011). The binding of learning to action in motor adaptation. *PLoS*  
558 *Computational Biology*, 7(6), e1002052.
- 559 Hadjiosif, A. M., Criscimagna-Hemminger, S. E., Gibo, T. L., Okamura, A. M., Shadmehr, R., Bastian, A. J., & Smith, M.  
560 A. (2014). Cerebellar damage reduces the stability of motor memories. *Proceeding of the Translational and*  
561 *Computational Motor Control*.
- 562 Haith, A. M., Huberdeau, D. M., & Krakauer, J. W. (2015). The influence of movement preparation time on the expression  
563 of visuomotor learning and savings. *The Journal of Neuroscience: The Official Journal of the Society for*  
564 *Neuroscience*, 35(13), 5109–5117.
- 565 Hayashi, T., Kato, Y., & Nozaki, D. (2020). Divisively Normalized Integration of Multisensory Error Information Develops  
566 Motor Memories Specific to Vision and Proprioception. *The Journal of Neuroscience: The Official Journal of the*  
567 *Society for Neuroscience*, 40(7), 1560–1570.
- 568 Heffley, W., & Hull, C. (2019). Classical conditioning drives learned reward prediction signals in climbing fibers across  
569 the lateral cerebellum. *ELife*, 8. doi:10.7554/eLife.46764
- 570 Hegele, M., & Heuer, H. (2010). Implicit and explicit components of dual adaptation to visuomotor rotations. *Consciousness*  
571 *and Cognition*, 19(4), 906–917.
- 572 Hull, C. (2020). Prediction signals in the cerebellum: beyond supervised motor learning. *ELife*, 9. doi:10.7554/eLife.54073
- 573 Izawa, J., Criscimagna-Hemminger, S. E., & Shadmehr, R. (2012). Cerebellar contributions to reach adaptation and learning  
574 sensory consequences of action. *The Journal of Neuroscience: The Official Journal of the Society for Neuroscience*,  
575 32(12), 4230–4239.
- 576 Kasuga, S., Hirashima, M., & Nozaki, D. (2013). Simultaneous processing of information on multiple errors in visuomotor  
577 learning. *PloS One*, 8(8), e72741.
- 578 Kim, H. E., Avraham, G., & Ivry, R. B. (2020). The Psychology of Reaching: Action Selection, Movement Implementation,  
579 and Sensorimotor Learning. *Annual Review of Psychology*. doi:10.1146/annurev-psych-010419-051053

- 580 Kim, H. E., Morehead, J. R., Parvin, D. E., Moazzezi, R., & Ivry, R. B. (2018). Invariant errors reveal limitations in motor  
581 correction rather than constraints on error sensitivity. *Communications Biology*, *1*, 19.
- 582 Kim, H. E., Parvin, D. E., & Ivry, R. B. (2019). The influence of task outcome on implicit motor learning. *ELife*, *8*.  
583 doi:10.7554/eLife.39882
- 584 Körding, Konrad P., Beierholm, U., Ma, W. J., Quartz, S., Tenenbaum, J. B., & Shams, L. (2007). Causal inference in  
585 multisensory perception. *PloS One*, *2*(9), e943.
- 586 Körding, Konrad P., & Wolpert, D. M. (2004). Bayesian integration in sensorimotor learning. *Nature*, *427*(6971), 244–247.
- 587 Körding, Konrad Paul, & Wolpert, D. M. (2004). The loss function of sensorimotor learning. *Proceedings of the National  
588 Academy of Sciences of the United States of America*, *101*(26), 9839–9842.
- 589 Krakauer, J. W., Ghilardi, M. F., & Ghez, C. (1999). Independent learning of internal models for kinematic and dynamic  
590 control of reaching. *Nature Neuroscience*, *2*(11), 1026–1031.
- 591 Krakauer, John W., Hadjiosif, A. M., Xu, J., Wong, A. L., & Haith, A. M. (2019). Motor Learning. *Comprehensive  
592 Physiology*, *9*(2), 613–663.
- 593 Lee, K., Oh, Y., Izawa, J., & Schweighofer, N. (2018). Sensory prediction errors, not performance errors, update memories  
594 in visuomotor adaptation. *Scientific Reports*, *8*(1), 16483.
- 595 Leow, L.-A., Marinovic, W., de Rugy, A., & Carroll, T. J. (2018). Task errors contribute to implicit aftereffects in  
596 sensorimotor adaptation. *The European Journal of Neuroscience*, *48*(11), 3397–3409.
- 597 Leow, L.-A., Marinovic, W., de Rugy, A., & Carroll, T. J. (2020). Task Errors Drive Memories That Improve Sensorimotor  
598 Adaptation (pp. 3075–3088). doi:10.1523/JNEUROSCI.1506-19.2020
- 599 Lerner, G., Albert, S., Caffaro, P. A., Villalta, J. I., Jacobacci, F., Shadmehr, R., & Della-Maggiore, V. (2020). The Origins  
600 of Anterograde Interference in Visuomotor Adaptation. *Cerebral Cortex* . doi:10.1093/cercor/bhaa016
- 601 Magescas, F., & Prablanc, C. (2006). Automatic drive of limb motor plasticity. *Journal of Cognitive Neuroscience*, *18*(1),  
602 75–83.
- 603 Mazzoni, P., & Krakauer, J. W. (2006). An implicit plan overrides an explicit strategy during visuomotor adaptation. *The  
604 Journal of Neuroscience: The Official Journal of the Society for Neuroscience*, *26*(14), 3642–3645.
- 605 McDougle, S. D., Ivry, R. B., & Taylor, J. A. (2016). Taking Aim at the Cognitive Side of Learning in Sensorimotor  
606 Adaptation Tasks. *Trends in Cognitive Sciences*, *20*(7), 535–544.

- 507 Miyamoto, Y. R., Wang, S., & Smith, M. A. (2020). Implicit adaptation compensates for erratic explicit strategy in human  
508 motor learning. *Nature Neuroscience*, 23(3), 443–455.
- 509 Morehead, J. R., Taylor, J. A., Parvin, D. E., & Ivry, R. B. (2017). Characteristics of Implicit Sensorimotor Adaptation  
510 Revealed by Task-irrelevant Clamped Feedback. *Journal of Cognitive Neuroscience*, 29(6), 1061–1074.
- 511 Nikooyan, A. A., & Ahmed, A. A. (2015). Reward feedback accelerates motor learning. *Journal of Neurophysiology*,  
512 113(2), 633–646.
- 513 Ohmae, S., & Medina, J. F. (2015). Climbing fibers encode a temporal-difference prediction error during cerebellar learning  
514 in mice. *Nature Neuroscience*, 18(12), 1798–1803.
- 515 Oldfield, R. C. (1971). The assessment and analysis of handedness: the Edinburgh inventory. *Neuropsychologia*, 9(1), 97–  
516 113.
- 517 Oza, A., Kumar, A., & Mutha, P. K. (2020). Task Errors Do Not Induce Implicit Sensorimotor Learning (p.  
518 2020.11.13.381285). doi:10.1101/2020.11.13.381285
- 519 Ryan Morehead, J., & de Xivry, J.-J. O. (2021). A Synthesis of the Many Errors and Learning Processes of Visuomotor  
520 Adaptation. *BioRxiv*. doi:10.1101/2021.03.14.435278
- 521 Schlerf, J. E., Xu, J., Klempfuss, N. M., Griffiths, T. L., & Ivry, R. B. (2013). Individuals with cerebellar degeneration show  
522 similar adaptation deficits with large and small visuomotor errors. *Journal of Neurophysiology*, 109(4), 1164–1173.
- 523 Sendhilnathan, N., Ipata, A. E., & Goldberg, M. E. (2020). Neural Correlates of Reinforcement Learning in Mid-lateral  
524 Cerebellum. *Neuron*. doi:10.1016/j.neuron.2019.12.032
- 525 Shadmehr, R., Smith, M. A., & Krakauer, J. W. (2010). Error correction, sensory prediction, and adaptation in motor control.  
526 *Annual Review of Neuroscience*, 33, 89–108.
- 527 Shams, L., & Beierholm, U. R. (2010). Causal inference in perception. *Trends in Cognitive Sciences*, 14(9), 425–432.
- 528 Shmuelof, L., Huang, V. S., Haith, A. M., Delnicki, R. J., Mazzoni, P., & Krakauer, J. W. (2012). Overcoming motor  
529 “forgetting” through reinforcement of learned actions. *The Journal of Neuroscience: The Official Journal of the*  
530 *Society for Neuroscience*, 32(42), 14617–14621.
- 531 Taylor, J. A., & Ivry, R. B. (2011). Flexible cognitive strategies during motor learning. *PLoS Computational Biology*, 7(3),  
532 e1001096.
- 533 Taylor, J. A., & Ivry, R. B. (2014). Cerebellar and prefrontal cortex contributions to adaptation, strategies, and reinforcement  
534 learning. *Progress in Brain Research*, 210, 217–253.

- 535 Taylor, J. A., Klemfuss, N. M., & Ivry, R. B. (2010). An explicit strategy prevails when the cerebellum fails to compute  
536 movement errors. *Cerebellum*, 9(4), 580–586.
- 537 Taylor, J. A., Krakauer, J. W., & Ivry, R. B. (2014). Explicit and implicit contributions to learning in a sensorimotor  
538 adaptation task. *The Journal of Neuroscience: The Official Journal of the Society for Neuroscience*, 34(8), 3023–  
539 3032.
- 540 Tsay, J. S., Avraham, G., Kim, H. E., Parvin, D. E., Wang, Z., & Ivry, R. B. (2020). The Effect of Visual Uncertainty on  
541 Implicit Motor Adaptation. *Journal of Neurophysiology*. doi:10.1152/jn.00493.2020
- 542 Tsay, J. S., Lee, A. S., Ivry, R. B., & Avraham, G. (2021). Moving outside the lab: The viability of conducting sensorimotor  
543 learning studies online (p. 2021.01.30.181370). doi:10.1101/2021.01.30.181370
- 544 Tsay, J. S., Parvin, D. E., & Ivry, R. B. (2020). Continuous reports of sensed hand position during sensorimotor adaptation.  
545 *Journal of Neurophysiology*, 124(4), 1122–1130.
- 546 Tseng, Y.-W., Diedrichsen, J., Krakauer, J. W., Shadmehr, R., & Bastian, A. J. (2007). Sensory prediction errors drive  
547 cerebellum-dependent adaptation of reaching. *Journal of Neurophysiology*, 98(1), 54–62.
- 548 Wagner, M. J., Kim, T. H., Savall, J., Schnitzer, M. J., & Luo, L. (2017). Cerebellar granule cells encode the expectation of  
549 reward. *Nature*, 544(7648), 96–100.
- 550 Wei, K., & Körding, K. (2009). Relevance of error: what drives motor adaptation? *Journal of Neurophysiology*, 101(2),  
551 655–664.
- 552 Wei, K., & Körding, K. (2010). Uncertainty of feedback and state estimation determines the speed of motor adaptation.  
553 *Frontiers in Computational Neuroscience*, 4, 11.
- 554 Werner, S., van Aken, B. C., Hulst, T., Frens, M. A., van der Geest, J. N., Strüder, H. K., & Donchin, O. (2015). Awareness  
555 of sensorimotor adaptation to visual rotations of different size. *PloS One*, 10(4), e0123321.
- 556 Wolpert, D. M., Miall, R. C., & Kawato, M. (1998). Internal models in the cerebellum. *Trends in Cognitive Sciences*, 2(9),  
557 338–347.
